# Supplementary material for: Functionalized nona-silicide [Si9R3] Zintl clusters: a new class of superhalogens
Source: Royal Society of Chemistry journal article supplement (doi:10.1039/d2cp02619h), 2022-01-01
Supplement: d2cp02619h1.pdf [file d2cp02619h1.pdf]

## Supporting Information

### Functionalized Nona-silicide [Si<sub>9</sub>R<sub>3</sub>] Zintl Clusters: A New Class of Superhalogens

Swapan Sinha<sup>1,2</sup> Puru Jena<sup>3</sup> Santanab Giri<sup>1\*</sup>

<sup>1</sup>School of Applied Science and Humanities, Haldia Institute of Technology, Haldia, India. 721657

<sup>2</sup>Maulana Abul Kalam Azad University of Technology, Haringhata, 741249, India.

<sup>3</sup>Physics Department, Virginia Commonwealth University, Richmond, Virginia 23284, United States.

Corresponding Author

\* Email: sgiri.chem@hithaldia.in

Table S1: Calculated Laplacian electron density ( $\nabla^2\rho$ ) and energy density (H) values (in atomic units) at BCP (3, -1) of Si-Si bond in Si<sub>9</sub>{Si (tBu)<sub>2</sub>H}<sub>3</sub>}<sup>-</sup>, [Si<sub>9</sub>{Si (TMS)<sub>3</sub>}<sub>3</sub>]<sup>-</sup>.

| Systems                                                                | Si-Si, BCP (3, -1) |         | Si-Si, BCP (3, -1) |         | Si-Si, BCP (3, -1) |         |
|------------------------------------------------------------------------|--------------------|---------|--------------------|---------|--------------------|---------|
|                                                                        | $\nabla^2\rho$     | H       | $\nabla^2\rho$     | H       | $\nabla^2\rho$     | H       |
| [Si <sub>9</sub> {Si (tBu) <sub>2</sub> H} <sub>3</sub> } <sup>-</sup> | -0.0769            | -0.0285 | -0.0742            | -0.0276 | -0.0738            | -0.0275 |
| [Si <sub>9</sub> {Si (TMS) <sub>3</sub> } <sub>3</sub> ] <sup>-</sup>  | -0.0699            | -0.0275 | -0.0699            | -0.0275 | -0.0696            | -0.0274 |

Table S2: Calculated Laplacian electron density ( $\nabla^2\rho$ ) and energy density (H) values (in atomic units) at BCP (3, -1) of Si-C, Si-C, Si-N bond in [Si<sub>9</sub>(CF<sub>3</sub>)<sub>3</sub>]<sup>-</sup>, [Si<sub>9</sub>(CN)<sub>3</sub>]<sup>-</sup> and [Si<sub>9</sub>(NO<sub>2</sub>)<sub>3</sub>]<sup>-</sup> respectively.

| Systems                                                         | BCP (3, -1) | $\nabla^2\rho$ (BCP) | H (BCP) |
|-----------------------------------------------------------------|-------------|----------------------|---------|
| [Si <sub>9</sub> (CF <sub>3</sub> ) <sub>3</sub> ] <sup>-</sup> | Si-C        | 0.2239               | -0.0315 |
|                                                                 | Si-C        | 0.2715               | -0.0314 |
|                                                                 | Si-C        | 0.2715               | -0.0314 |
| [Si <sub>9</sub> (CN) <sub>3</sub> ] <sup>-</sup>               | Si-C        | 0.3251               | -0.0516 |
|                                                                 | Si-C        | 0.3251               | -0.0517 |
|                                                                 | Si-C        | 0.3251               | -0.0517 |
| [Si <sub>9</sub> (NO <sub>2</sub> ) <sub>3</sub> ] <sup>-</sup> | Si-N        | 0.2595               | -0.0436 |
|                                                                 | Si-N        | 0.2586               | -0.0436 |
|                                                                 | Si-N        | 0.2597               | -0.0436 |

Table S3: Cartesian coordinates of optimized geometries of  $[\text{Si}_9(\text{CH}_3)_3]^-$ .

| Standard orientation |               |             |                         |           |           |  |
|----------------------|---------------|-------------|-------------------------|-----------|-----------|--|
| Center Number        | Atomic Number | Atomic Type | Coordinates (Angstroms) |           |           |  |
|                      |               |             | X                       | Y         | Z         |  |
| 1                    | 14            | 0           | -1.428707               | 0.099062  | -1.592303 |  |
| 2                    | 14            | 0           | -1.427782               | 0.098986  | 1.593146  |  |
| 3                    | 14            | 0           | -1.304118               | -1.862785 | 0.000074  |  |
| 4                    | 14            | 0           | 0.659540                | -1.347938 | 1.491203  |  |
| 5                    | 14            | 0           | 0.659279                | -1.347292 | -1.492001 |  |
| 6                    | 14            | 0           | 2.300002                | -0.154665 | -0.000027 |  |
| 7                    | 14            | 0           | 0.835014                | 1.233396  | -1.507746 |  |
| 8                    | 14            | 0           | -1.024125               | 2.024124  | 0.000088  |  |
| 9                    | 14            | 0           | 0.835222                | 1.233751  | 1.507293  |  |
| 10                   | 6             | 0           | 4.236100                | -0.277650 | 0.000179  |  |
| 11                   | 1             | 0           | 4.559356                | -0.816380 | -0.865948 |  |
| 12                   | 1             | 0           | 4.655997                | 0.706407  | -0.014568 |  |
| 13                   | 1             | 0           | 4.560795                | -0.790811 | 0.881167  |  |
| 14                   | 6             | 0           | -2.455130               | -3.424442 | 0.000132  |  |
| 15                   | 1             | 0           | -3.478808               | -3.113021 | 0.000456  |  |
| 16                   | 1             | 0           | -2.260942               | -4.010675 | -0.873666 |  |
| 17                   | 1             | 0           | -2.260475               | -4.010956 | 0.873637  |  |
| 18                   | 6             | 0           | -1.935512               | 3.736717  | 0.000098  |  |
| 19                   | 1             | 0           | -1.658670               | 4.288076  | -0.874122 |  |
| 20                   | 1             | 0           | -2.993622               | 3.577650  | 0.001244  |  |
| 21                   | 1             | 0           | -1.656918               | 4.288998  | 0.873179  |  |

Table S4: Cartesian coordinates of optimized geometries of  $[\text{Si}_9(\text{CF}_3)_3]^-$ .

| Standard orientation |               |             |                         |           |           |  |
|----------------------|---------------|-------------|-------------------------|-----------|-----------|--|
| Center Number        | Atomic Number | Atomic Type | Coordinates (Angstroms) |           |           |  |
|                      |               |             | X                       | Y         | Z         |  |
| 1                    | 14            | 0           | -1.373798               | 0.515138  | -1.696207 |  |
| 2                    | 14            | 0           | -1.378925               | 0.525404  | 1.666382  |  |
| 3                    | 14            | 0           | -1.483836               | -1.229287 | -0.006341 |  |
| 4                    | 14            | 0           | 0.234934                | -1.475378 | 1.687842  |  |
| 5                    | 14            | 0           | 0.235307                | -1.479166 | -1.707375 |  |
| 6                    | 14            | 0           | 1.796711                | -0.713570 | -0.006328 |  |
| 7                    | 14            | 0           | 1.161104                | 0.910735  | -1.700010 |  |
| 8                    | 14            | 0           | -0.288672               | 1.889819  | -0.013082 |  |
| 9                    | 14            | 0           | 1.163655                | 0.922435  | 1.669762  |  |
| 10                   | 6             | 0           | 3.640739                | -1.369105 | 0.009544  |  |
| 11                   | 6             | 0           | -3.043275               | -2.411591 | 0.009466  |  |
| 12                   | 6             | 0           | -0.616803               | 3.818979  | 0.005990  |  |
| 13                   | 9             | 0           | -0.490362               | 4.352745  | 1.254627  |  |
| 14                   | 9             | 0           | 0.241946                | 4.520496  | -0.788679 |  |
| 15                   | 9             | 0           | -1.868360               | 4.160065  | -0.417208 |  |
| 16                   | 9             | 0           | 4.565984                | -0.389148 | -0.205260 |  |
| 17                   | 9             | 0           | 3.881307                | -2.314189 | -0.944485 |  |
| 18                   | 9             | 0           | 3.982115                | -1.943242 | 1.198958  |  |
| 19                   | 9             | 0           | -4.221037               | -1.756868 | -0.206135 |  |
| 20                   | 9             | 0           | -3.195611               | -3.061152 | 1.199165  |  |
| 21                   | 9             | 0           | -2.986503               | -3.385987 | -0.943760 |  |

Table S5: Cartesian coordinates of optimized geometries of  $[\text{Si}_9(\text{CN})_3]^-$ .

| Standard orientation |               |             |                         |           |           |  |
|----------------------|---------------|-------------|-------------------------|-----------|-----------|--|
| Center Number        | Atomic Number | Atomic Type | Coordinates (Angstroms) |           |           |  |
|                      |               |             | X                       | Y         | Z         |  |
| 1                    | 14            | 0           | 1.415080                | 0.357412  | 1.669279  |  |
| 2                    | 14            | 0           | 1.418737                | 0.361772  | -1.658607 |  |
| 3                    | 14            | 0           | 1.397377                | -1.415715 | -0.000264 |  |
| 4                    | 14            | 0           | -0.402615               | -1.426560 | -1.632291 |  |
| 5                    | 14            | 0           | -0.401455               | -1.425809 | 1.639619  |  |
| 6                    | 14            | 0           | -1.936082               | -0.487275 | 0.000697  |  |
| 7                    | 14            | 0           | -1.029671               | 1.048885  | 1.652777  |  |
| 8                    | 14            | 0           | 0.547149                | 1.907135  | 0.003361  |  |
| 9                    | 14            | 0           | -1.032125               | 1.055128  | -1.640532 |  |
| 10                   | 6             | 0           | 1.085727                | 3.770844  | -0.007739 |  |
| 11                   | 7             | 0           | 1.407763                | 4.885226  | -0.014376 |  |
| 12                   | 6             | 0           | -3.820346               | -0.948844 | -0.009400 |  |
| 13                   | 7             | 0           | -4.947019               | -1.224834 | -0.015438 |  |
| 14                   | 6             | 0           | 2.755905                | -2.800602 | -0.009666 |  |
| 15                   | 7             | 0           | 3.568221                | -3.628679 | -0.015288 |  |

Table S6: Cartesian coordinates of optimized geometries of  $[\text{Si}_9(\text{NO}_2)_3]^-$ .

| Standard orientation |               |             |                         |           |           |  |
|----------------------|---------------|-------------|-------------------------|-----------|-----------|--|
| Center Number        | Atomic Number | Atomic Type | Coordinates (Angstroms) |           |           |  |
|                      |               |             | X                       | Y         | Z         |  |
| 1                    | 14            | 0           | 1.415619                | 0.351412  | 1.670360  |  |
| 2                    | 14            | 0           | 1.419244                | 0.352296  | -1.657528 |  |
| 3                    | 14            | 0           | 1.389635                | -1.423348 | 0.002661  |  |
| 4                    | 14            | 0           | -0.410414               | -1.427509 | -1.629334 |  |
| 5                    | 14            | 0           | -0.409200               | -1.423363 | 1.642573  |  |
| 6                    | 14            | 0           | -1.939465               | -0.479397 | 0.002693  |  |
| 7                    | 14            | 0           | -1.025887               | 1.054242  | 1.653166  |  |
| 8                    | 14            | 0           | 0.554886                | 1.903426  | 0.002842  |  |
| 9                    | 14            | 0           | -1.028363               | 1.057074  | -1.640148 |  |
| 10                   | 7             | 0           | 1.082390                | 3.697439  | -0.009730 |  |
| 11                   | 7             | 0           | -3.757793               | -0.915861 | -0.006558 |  |
| 12                   | 7             | 0           | 2.692914                | -2.764357 | -0.005029 |  |
| 13                   | 8             | 0           | 2.404172                | 4.017575  | -0.011884 |  |
| 14                   | 8             | 0           | -4.693965               | 0.070377  | 0.016200  |  |
| 15                   | 8             | 0           | -4.144041               | -2.219526 | -0.036045 |  |
| 16                   | 8             | 0           | 0.144246                | 4.682039  | -0.016720 |  |
| 17                   | 8             | 0           | 4.011464                | -2.431156 | -0.003305 |  |
| 18                   | 8             | 0           | 2.322203                | -4.072837 | -0.012344 |  |

Table S7: Cartesian coordinates of optimized geometries of  $[\text{Si}_9\{\text{Si}(\text{tBu})_2\text{H}\}_3]^-$ .

| Standard orientation |               |             |                         |           |           |  |
|----------------------|---------------|-------------|-------------------------|-----------|-----------|--|
| Center Number        | Atomic Number | Atomic Type | Coordinates (Angstroms) |           |           |  |
|                      |               |             | X                       | Y         | Z         |  |
| 1                    | 14            | 0           | -1.400080               | 0.958405  | 1.398795  |  |
| 2                    | 14            | 0           | -0.917918               | 1.172531  | -1.887012 |  |
| 3                    | 14            | 0           | 1.411469                | 0.174868  | -1.579157 |  |
| 4                    | 14            | 0           | 0.930990                | -0.033196 | 1.650587  |  |
| 5                    | 14            | 0           | 0.911209                | -1.701970 | -0.120513 |  |
| 6                    | 14            | 0           | -1.080158               | -1.558626 | 1.266803  |  |
| 7                    | 14            | 0           | -2.230453               | -0.327484 | -0.495195 |  |
| 8                    | 14            | 0           | -0.602409               | -1.353060 | -1.985185 |  |
| 9                    | 14            | 0           | -4.103435               | -0.538803 | -0.797895 |  |
| 10                   | 6             | 0           | -6.378866               | -3.159631 | -0.329631 |  |
| 11                   | 1             | 0           | -6.923993               | -3.761641 | 0.367019  |  |
| 12                   | 1             | 0           | -7.044119               | -2.463791 | -0.796692 |  |
| 13                   | 1             | 0           | -5.938448               | -3.787717 | -1.075579 |  |
| 14                   | 6             | 0           | -5.725360               | -1.361186 | 2.195204  |  |
| 15                   | 1             | 0           | -6.603743               | -0.809691 | 1.932154  |  |
| 16                   | 1             | 0           | -5.979474               | -2.118215 | 2.907408  |  |
| 17                   | 1             | 0           | -5.002384               | -0.697986 | 2.622254  |  |
| 18                   | 6             | 0           | -3.573458               | -3.421859 | 1.118536  |  |
| 19                   | 1             | 0           | -2.910994               | -3.569511 | 0.291348  |  |
| 20                   | 1             | 0           | -3.027754               | -3.015639 | 1.944425  |  |
| 21                   | 1             | 0           | -4.004276               | -4.359317 | 1.402207  |  |
| 22                   | 6             | 0           | -7.000360               | 1.380804  | -1.232100 |  |
| 23                   | 1             | 0           | -7.685461               | 1.987260  | -0.677349 |  |
| 24                   | 1             | 0           | -6.938396               | 1.741319  | -2.237629 |  |
| 25                   | 1             | 0           | -7.344224               | 0.367574  | -1.237031 |  |
| 26                   | 6             | 0           | -5.445041               | 1.733007  | 1.505271  |  |
| 27                   | 1             | 0           | -5.318131               | 2.770360  | 1.734819  |  |
| 28                   | 1             | 0           | -6.420589               | 1.416883  | 1.810675  |  |
| 29                   | 1             | 0           | -4.705571               | 1.159775  | 2.024396  |  |
| 30                   | 6             | 0           | -4.244098               | 2.941214  | -1.165729 |  |
| 31                   | 1             | 0           | -3.505912               | 3.269447  | -0.464127 |  |
| 32                   | 1             | 0           | -3.762799               | 2.619746  | -2.065679 |  |
| 33                   | 1             | 0           | -4.910377               | 3.748828  | -1.386482 |  |
| 34                   | 6             | 0           | 2.434027                | -2.110076 | -2.996789 |  |
| 35                   | 1             | 0           | 1.367828                | -2.200128 | -2.999781 |  |
| 36                   | 1             | 0           | 2.705794                | -1.096808 | -2.786239 |  |
| 37                   | 1             | 0           | 2.818352                | -2.390648 | -3.955160 |  |
| 38                   | 6             | 0           | 3.274254                | -5.088403 | -2.318664 |  |
| 39                   | 1             | 0           | 2.476546                | -5.250924 | -3.013034 |  |
| 40                   | 1             | 0           | 4.212227                | -5.233927 | -2.812556 |  |
| 41                   | 1             | 0           | 3.187302                | -5.780400 | -1.507196 |  |
| 42                   | 6             | 0           | 4.958206                | -2.665745 | -1.164844 |  |
| 43                   | 1             | 0           | 5.474013                | -3.442599 | -0.640114 |  |
| 44                   | 1             | 0           | 5.497338                | -2.417956 | -2.055258 |  |
| 45                   | 1             | 0           | 4.885357                | -1.800514 | -0.539569 |  |
| 46                   | 6             | 0           | 3.798363                | -1.364438 | 1.796370  |  |
| 47                   | 1             | 0           | 3.677481                | -0.799905 | 0.895487  |  |
| 48                   | 1             | 0           | 3.225901                | -0.913112 | 2.579627  |  |
| 49                   | 1             | 0           | 4.832001                | -1.378327 | 2.072593  |  |
| 50                   | 6             | 0           | 4.708148                | -4.348147 | 1.243161  |  |
| 51                   | 1             | 0           | 5.596199                | -3.758368 | 1.151362  |  |
| 52                   | 1             | 0           | 4.802932                | -5.007626 | 2.080421  |  |
| 53                   | 1             | 0           | 4.567397                | -4.922129 | 0.351178  |  |
| 54                   | 6             | 0           | 2.175138                | -3.775051 | 3.057461  |  |

|    |    |   |           |           |           |
|----|----|---|-----------|-----------|-----------|
| 55 | 1  | 0 | 2.678946  | -4.600765 | 3.514926  |
| 56 | 1  | 0 | 2.095278  | -2.972208 | 3.760288  |
| 57 | 1  | 0 | 1.196200  | -4.079775 | 2.751317  |
| 58 | 6  | 0 | 3.850317  | 2.407070  | 1.588882  |
| 59 | 1  | 0 | 3.834545  | 1.634820  | 2.329342  |
| 60 | 1  | 0 | 3.819033  | 1.967146  | 0.614004  |
| 61 | 1  | 0 | 4.746827  | 2.981964  | 1.692154  |
| 62 | 6  | 0 | 1.293805  | 2.975613  | 3.371373  |
| 63 | 1  | 0 | 0.249053  | 3.001605  | 3.141767  |
| 64 | 1  | 0 | 1.578124  | 1.976166  | 3.626653  |
| 65 | 1  | 0 | 1.493658  | 3.625367  | 4.197677  |
| 66 | 6  | 0 | 2.907353  | 5.387821  | 2.100947  |
| 67 | 1  | 0 | 2.105731  | 5.967989  | 2.508016  |
| 68 | 1  | 0 | 3.733503  | 5.394439  | 2.780898  |
| 69 | 1  | 0 | 3.212194  | 5.807777  | 1.165207  |
| 70 | 6  | 0 | 3.967612  | 4.670664  | -0.702293 |
| 71 | 1  | 0 | 4.611581  | 4.811037  | -1.545204 |
| 72 | 1  | 0 | 3.796320  | 5.612163  | -0.223609 |
| 73 | 1  | 0 | 4.427973  | 3.997093  | -0.010000 |
| 74 | 6  | 0 | 2.602905  | 2.332217  | -2.347136 |
| 75 | 1  | 0 | 2.980998  | 1.558980  | -1.711487 |
| 76 | 1  | 0 | 1.688092  | 2.008099  | -2.797652 |
| 77 | 1  | 0 | 3.319965  | 2.548113  | -3.111409 |
| 78 | 6  | 0 | 1.343961  | 5.239095  | -2.384437 |
| 79 | 1  | 0 | 1.233676  | 6.148566  | -1.831627 |
| 80 | 1  | 0 | 1.906500  | 5.428787  | -3.274643 |
| 81 | 1  | 0 | 0.377680  | 4.861747  | -2.646756 |
| 82 | 14 | 0 | 1.189253  | 3.479542  | 0.245450  |
| 83 | 14 | 0 | 2.043874  | -3.236750 | -0.061716 |
| 84 | 1  | 0 | -4.315835 | -0.941228 | -2.195693 |
| 85 | 1  | 0 | 0.092284  | 4.449906  | 0.371755  |
| 86 | 1  | 0 | 1.218175  | -4.452366 | -0.024316 |
| 87 | 6  | 0 | -5.247108 | 1.464674  | -0.405859 |
| 88 | 6  | 0 | -4.982862 | -2.190975 | 0.606574  |
| 89 | 6  | 0 | 2.310182  | 3.562511  | 1.826663  |
| 90 | 6  | 0 | 2.275933  | 3.930380  | -1.297104 |
| 91 | 6  | 0 | 3.177590  | -3.275244 | -1.635503 |
| 92 | 6  | 0 | 3.181381  | -3.181097 | 1.508819  |
| 93 | 14 | 0 | 0.465325  | 1.726041  | 0.033999  |

Table S8: Cartesian coordinates of optimized geometries of  $[\text{Si}_9\{\text{Si}(\text{TMS})_3\}_3]^-$ .

| Standard orientation |               |             |                         |           |           |  |
|----------------------|---------------|-------------|-------------------------|-----------|-----------|--|
| Center Number        | Atomic Number | Atomic Type | Coordinates (Angstroms) |           |           |  |
|                      |               |             | X                       | Y         | Z         |  |
| 1                    | 14            | 0           | 1.356374                | 0.484737  | -1.685341 |  |
| 2                    | 14            | 0           | 1.361805                | 0.483038  | 1.642545  |  |
| 3                    | 14            | 0           | 0.385035                | 1.968244  | -0.015798 |  |
| 4                    | 14            | 0           | -1.136493               | 1.006452  | 1.616229  |  |
| 5                    | 14            | 0           | -1.135111               | 1.006446  | -1.655681 |  |
| 6                    | 14            | 0           | -1.921089               | -0.611629 | -0.016759 |  |
| 7                    | 14            | 0           | -0.329237               | -1.416225 | -1.668839 |  |
| 8                    | 14            | 0           | 1.461463                | -1.288368 | -0.019423 |  |
| 9                    | 14            | 0           | -0.327936               | -1.422806 | 1.624470  |  |
| 10                   | 14            | 0           | 2.896965                | -2.546763 | -0.008500 |  |
| 11                   | 14            | 0           | 4.940884                | -1.490376 | -0.435167 |  |
| 12                   | 14            | 0           | 2.554884                | -4.199595 | -1.629217 |  |

|    |    |   |           |           |           |
|----|----|---|-----------|-----------|-----------|
| 13 | 14 | 0 | 3.019101  | -3.583372 | 2.085808  |
| 14 | 14 | 0 | -3.809075 | -3.143324 | -0.311198 |
| 15 | 14 | 0 | -4.542302 | -0.842122 | 1.710372  |
| 16 | 14 | 0 | -4.757084 | -0.336216 | -1.386976 |
| 17 | 14 | 0 | 2.667350  | 4.155208  | -0.295225 |
| 18 | 14 | 0 | 0.274906  | 4.602414  | 1.704163  |
| 19 | 14 | 0 | -0.226493 | 4.744127  | -1.397923 |
| 20 | 6  | 0 | 3.222231  | -5.898276 | -0.971393 |
| 21 | 1  | 0 | 3.265576  | -6.600705 | -1.777379 |
| 22 | 1  | 0 | 4.202046  | -5.762673 | -0.563380 |
| 23 | 1  | 0 | 2.567144  | -6.268349 | -0.210599 |
| 24 | 6  | 0 | 3.500708  | -3.718397 | -3.253245 |
| 25 | 1  | 0 | 4.555147  | -3.792153 | -3.087059 |
| 26 | 1  | 0 | 3.216547  | -4.383425 | -4.041845 |
| 27 | 1  | 0 | 3.252094  | -2.714210 | -3.526556 |
| 28 | 6  | 0 | 0.658106  | -4.352411 | -2.006685 |
| 29 | 1  | 0 | 0.102404  | -4.216240 | -1.102499 |
| 30 | 1  | 0 | 0.374141  | -3.603398 | -2.716083 |
| 31 | 1  | 0 | 0.451613  | -5.321878 | -2.409665 |
| 32 | 6  | 0 | 2.098342  | -5.289578 | 2.017522  |
| 33 | 1  | 0 | 2.798259  | -6.063331 | 1.780198  |
| 34 | 1  | 0 | 1.651636  | -5.492110 | 2.968487  |
| 35 | 1  | 0 | 1.337289  | -5.254344 | 1.266218  |
| 36 | 6  | 0 | 4.878780  | -3.870564 | 2.557735  |
| 37 | 1  | 0 | 5.338379  | -2.931267 | 2.784431  |
| 38 | 1  | 0 | 4.934884  | -4.510783 | 3.413230  |
| 39 | 1  | 0 | 5.388775  | -4.328040 | 1.735835  |
| 40 | 6  | 0 | 2.181439  | -2.449384 | 3.418473  |
| 41 | 1  | 0 | 2.459930  | -1.430765 | 3.245970  |
| 42 | 1  | 0 | 1.117881  | -2.544800 | 3.350361  |
| 43 | 1  | 0 | 2.504498  | -2.747142 | 4.394113  |
| 44 | 6  | 0 | 6.395415  | -2.648684 | 0.118244  |
| 45 | 1  | 0 | 7.254239  | -2.458690 | -0.491037 |
| 46 | 1  | 0 | 6.635229  | -2.455330 | 1.142941  |
| 47 | 1  | 0 | 6.099017  | -3.670891 | 0.008060  |
| 48 | 6  | 0 | 5.094342  | -1.121627 | -2.333607 |
| 49 | 1  | 0 | 5.562817  | -0.170140 | -2.475398 |
| 50 | 1  | 0 | 5.685442  | -1.882986 | -2.798185 |
| 51 | 1  | 0 | 4.119406  | -1.108372 | -2.774315 |
| 52 | 6  | 0 | 5.027426  | 0.174989  | 0.556129  |
| 53 | 1  | 0 | 4.552197  | 0.950580  | -0.007357 |
| 54 | 1  | 0 | 4.526781  | 0.057928  | 1.494506  |
| 55 | 1  | 0 | 6.051031  | 0.434986  | 0.727984  |
| 56 | 6  | 0 | -2.351609 | -3.676239 | -1.475412 |
| 57 | 1  | 0 | -2.231375 | -2.949788 | -2.251758 |
| 58 | 1  | 0 | -1.447563 | -3.743810 | -0.907051 |
| 59 | 1  | 0 | -2.572031 | -4.629047 | -1.909545 |
| 60 | 6  | 0 | -3.656528 | -4.074766 | 1.383719  |
| 61 | 1  | 0 | -4.634124 | -4.292100 | 1.760509  |
| 62 | 1  | 0 | -3.117891 | -4.988292 | 1.241451  |
| 63 | 1  | 0 | -3.133431 | -3.457638 | 2.084022  |
| 64 | 6  | 0 | -5.501377 | -3.593172 | -1.146274 |
| 65 | 1  | 0 | -5.649314 | -4.652078 | -1.104639 |
| 66 | 1  | 0 | -6.297201 | -3.101173 | -0.627139 |
| 67 | 1  | 0 | -5.490998 | -3.274378 | -2.167627 |
| 68 | 6  | 0 | -3.155394 | -0.487153 | 3.019602  |
| 69 | 1  | 0 | -2.335276 | -1.155753 | 2.860605  |
| 70 | 1  | 0 | -2.817416 | 0.522792  | 2.916250  |
| 71 | 1  | 0 | -3.548547 | -0.632716 | 4.004052  |
| 72 | 6  | 0 | -5.597585 | -2.365890 | 2.283180  |
| 73 | 1  | 0 | -4.979832 | -3.037968 | 2.841386  |

|     |    |   |           |           |           |
|-----|----|---|-----------|-----------|-----------|
| 74  | 1  | 0 | -6.405327 | -2.029142 | 2.898853  |
| 75  | 1  | 0 | -5.989631 | -2.870989 | 1.425232  |
| 76  | 6  | 0 | -5.689443 | 0.713672  | 1.545533  |
| 77  | 1  | 0 | -6.598208 | 0.436224  | 1.053527  |
| 78  | 1  | 0 | -5.913532 | 1.096363  | 2.519305  |
| 79  | 1  | 0 | -5.189291 | 1.466521  | 0.972849  |
| 80  | 6  | 0 | -4.249556 | 1.534614  | -1.464484 |
| 81  | 1  | 0 | -3.752823 | 1.807314  | -0.556854 |
| 82  | 1  | 0 | -3.590519 | 1.691367  | -2.292735 |
| 83  | 1  | 0 | -5.125400 | 2.137012  | -1.586612 |
| 84  | 6  | 0 | -6.647733 | -0.476842 | -0.975549 |
| 85  | 1  | 0 | -7.029312 | 0.488841  | -0.717181 |
| 86  | 1  | 0 | -7.171912 | -0.850485 | -1.830257 |
| 87  | 1  | 0 | -6.784753 | -1.146443 | -0.152287 |
| 88  | 6  | 0 | -4.404261 | -1.173521 | -3.101047 |
| 89  | 1  | 0 | -5.325407 | -1.506802 | -3.531529 |
| 90  | 1  | 0 | -3.940502 | -0.465152 | -3.755295 |
| 91  | 1  | 0 | -3.752277 | -2.010420 | -2.961706 |
| 92  | 6  | 0 | -2.123797 | 4.624244  | -1.011315 |
| 93  | 1  | 0 | -2.613778 | 4.083468  | -1.793863 |
| 94  | 1  | 0 | -2.266824 | 4.114218  | -0.081629 |
| 95  | 1  | 0 | -2.537241 | 5.608925  | -0.945222 |
| 96  | 6  | 0 | 0.138967  | 3.906418  | -3.109146 |
| 97  | 1  | 0 | 1.026859  | 3.314063  | -3.033891 |
| 98  | 1  | 0 | -0.684837 | 3.281042  | -3.383287 |
| 99  | 1  | 0 | 0.276446  | 4.662114  | -3.854077 |
| 100 | 6  | 0 | 0.303276  | 6.609197  | -1.464684 |
| 101 | 1  | 0 | 1.254787  | 6.692656  | -1.946931 |
| 102 | 1  | 0 | -0.425403 | 7.167494  | -2.014440 |
| 103 | 1  | 0 | 0.372636  | 6.996115  | -0.469504 |
| 104 | 6  | 0 | -0.735460 | 6.232582  | 1.412085  |
| 105 | 1  | 0 | -1.110477 | 6.592197  | 2.347468  |
| 106 | 1  | 0 | -0.099003 | 6.973116  | 0.974555  |
| 107 | 1  | 0 | -1.554164 | 6.031548  | 0.753140  |
| 108 | 6  | 0 | -0.815002 | 3.333346  | 2.686592  |
| 109 | 1  | 0 | -1.618536 | 2.997131  | 2.065148  |
| 110 | 1  | 0 | -0.214292 | 2.496722  | 2.976606  |
| 111 | 1  | 0 | -1.213312 | 3.806234  | 3.559876  |
| 112 | 6  | 0 | 1.874505  | 5.007078  | 2.724521  |
| 113 | 1  | 0 | 2.436591  | 5.765454  | 2.220710  |
| 114 | 1  | 0 | 1.598143  | 5.355267  | 3.697808  |
| 115 | 1  | 0 | 2.471034  | 4.123704  | 2.817819  |
| 116 | 6  | 0 | 3.285821  | 3.073255  | -1.781990 |
| 117 | 1  | 0 | 3.703154  | 2.160965  | -1.409886 |
| 118 | 1  | 0 | 2.462504  | 2.851309  | -2.428357 |
| 119 | 1  | 0 | 4.032920  | 3.610742  | -2.327746 |
| 120 | 6  | 0 | 3.654854  | 3.679602  | 1.305473  |
| 121 | 1  | 0 | 4.537564  | 3.139813  | 1.032795  |
| 122 | 1  | 0 | 3.929430  | 4.569288  | 1.832698  |
| 123 | 1  | 0 | 3.042223  | 3.067385  | 1.933783  |
| 124 | 6  | 0 | 2.953141  | 6.031329  | -0.697836 |
| 125 | 1  | 0 | 3.968603  | 6.291502  | -0.483250 |
| 126 | 1  | 0 | 2.750702  | 6.208742  | -1.733424 |
| 127 | 1  | 0 | 2.297747  | 6.628509  | -0.098892 |
| 128 | 14 | 0 | 0.775582  | 3.836648  | -0.006547 |
| 129 | 14 | 0 | -3.726787 | -1.229117 | -0.006826 |

---

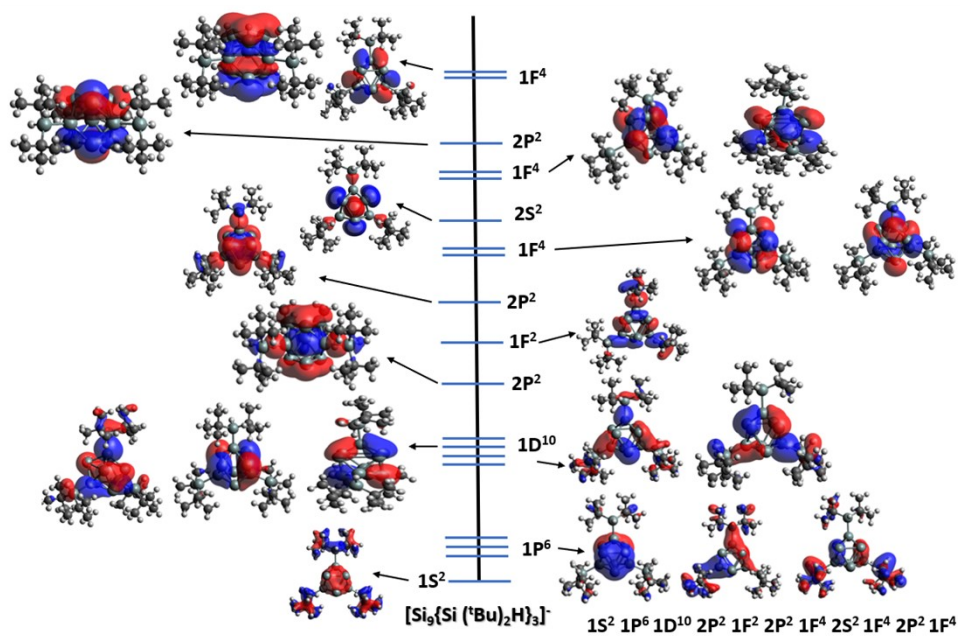

Fig S1: Electron shell structures of the  $[\text{Si}_9\{\text{Si}(\text{tBu})_2\text{H}\}_3]^-$ .

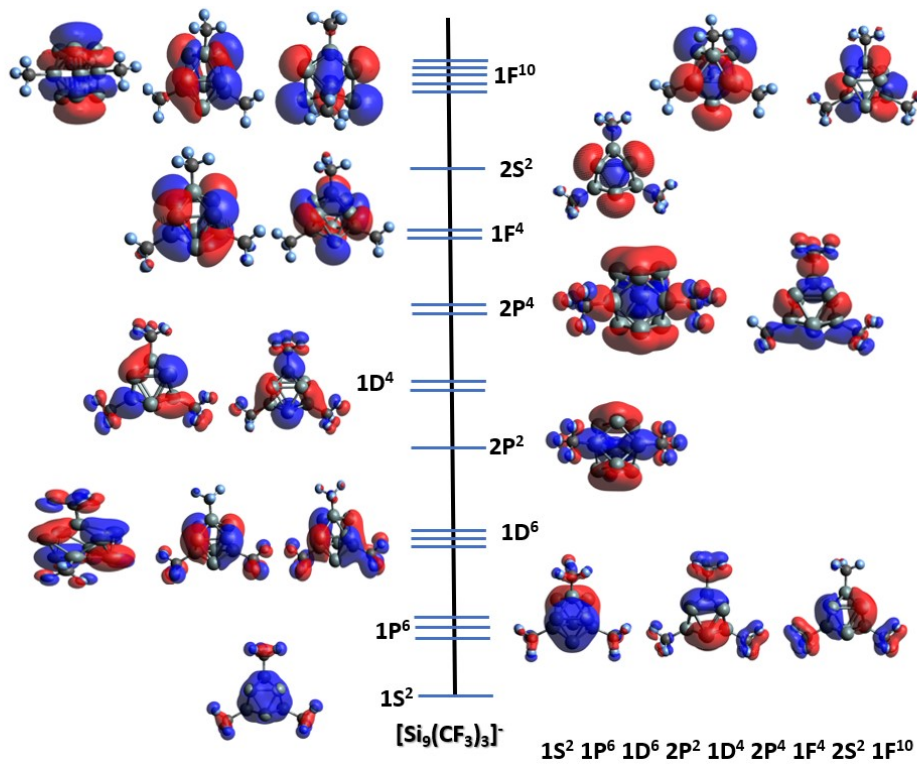

Fig S2: Electron shell structures of the  $[\text{Si}_9(\text{CF}_3)_3]^-$ .



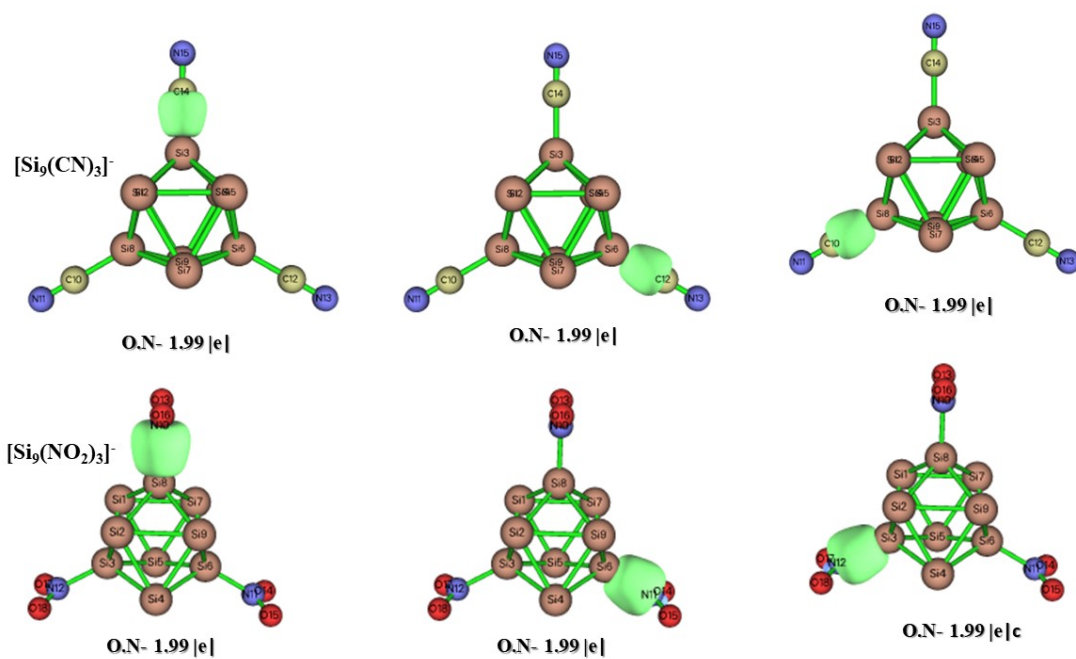

Fig. S3: AdNDP 2c-2e bond study  $[\text{Si}_9(\text{CN})_3]^-$ ,  $[\text{Si}_9(\text{NO}_2)_3]^-$ .

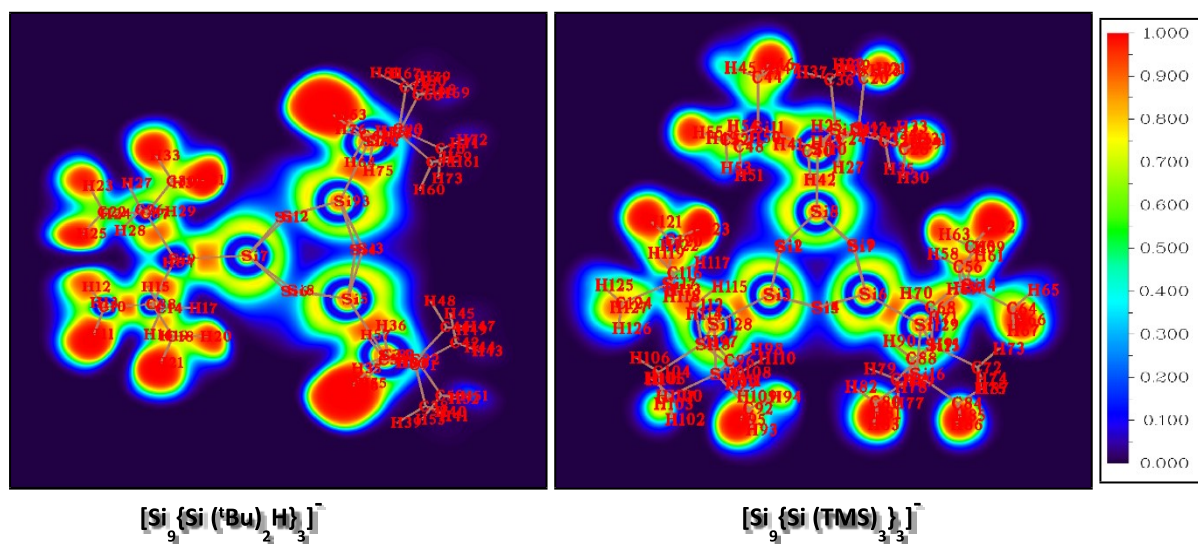

Fig. S4: Cut of plane ELF plot of  $[\text{Si}_9\{\text{Si}(\text{tBu})_2\text{H}\}_3]^-$  and  $[\text{Si}_9\{\text{Si}(\text{TMS})_3\}_3]^-$ .

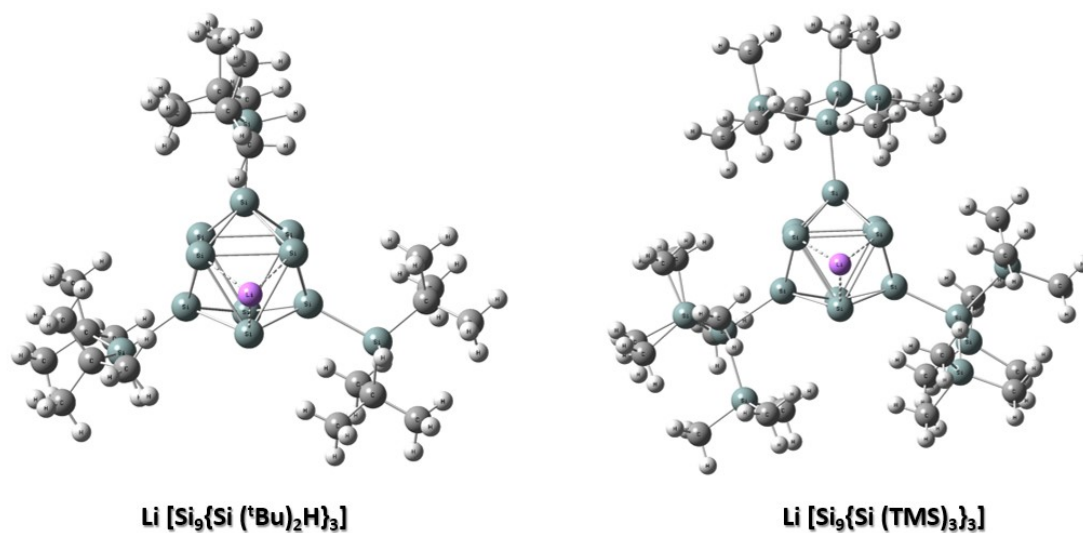

Fig. S5: Ground state geometries of different Li-Salts containing proposed electrolytes in Li-ion batteries.

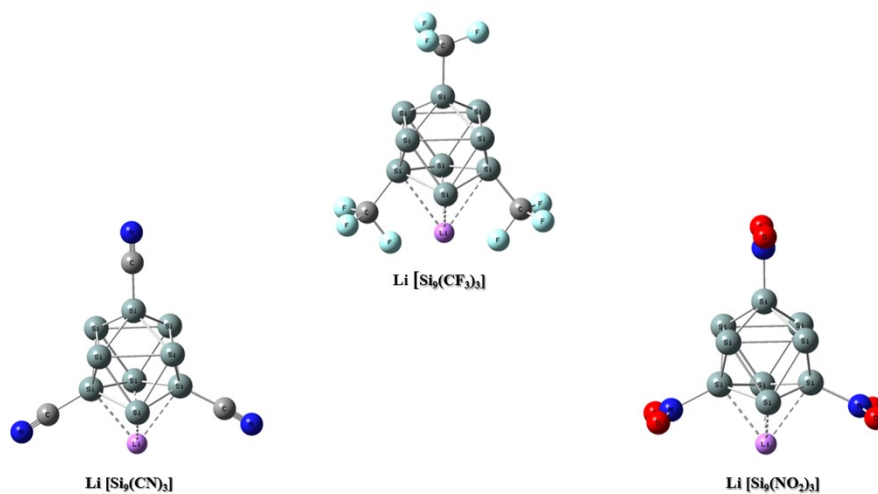

Fig. S6: Ground state geometries of different Li-Salts containing proposed electrolytes in Li-ion batteries.
